# Supplementary material for: Controlling carbon encapsulation of gold nano-aggregates as highly sensitive and spectrally stable SERS tags for live cell imaging
Source: Royal Society of Chemistry journal article supplement (doi:10.1039/c3tb20801j), 2013-01-01
Supplement: c3tb20801j.pdf [file c3tb20801j.pdf]

# **Controlling Carbon Encapsulation of Gold Nano-aggregates as A Highly Sensitive and Spectrally Stable SERS Tags for live Cell Imaging**

Guannan Zhang,<sup>a</sup> Gan Qu,<sup>a</sup> Yong Chen,<sup>a</sup> Aiguo Shen,\*<sup>a</sup> Wei Xie,<sup>b</sup> Xiaodong Zhou,  
<sup>a</sup> Jiming Hu\*<sup>a</sup>

*a.* Key Laboratory of Analytical Chemistry for Biology and Medicine (Ministry of Education), College of Chemistry & Molecular Sciences, Wuhan University, Wuhan, 430072, China.

*b.* Faculty of Chemistry, University of Duisburg –Essen, Universitaetsstr. 5, D-45141 Essen, Germany.

*E-mail: [jmhu@whu.edu.cn](mailto:jmhu@whu.edu.cn), [agshen@whu.edu.cn](mailto:agshen@whu.edu.cn)*

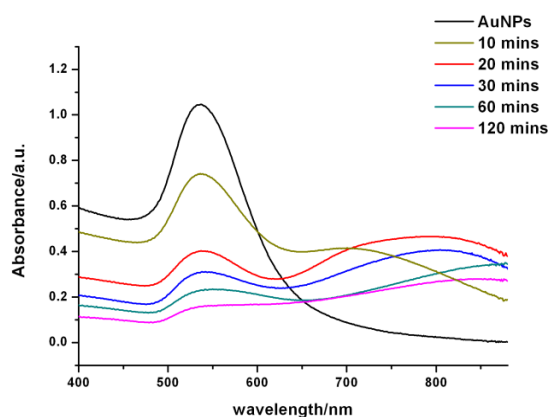

**Figure S1.** UV-Vis spectra of CTAB aggregated AuNPs at different reaction times.

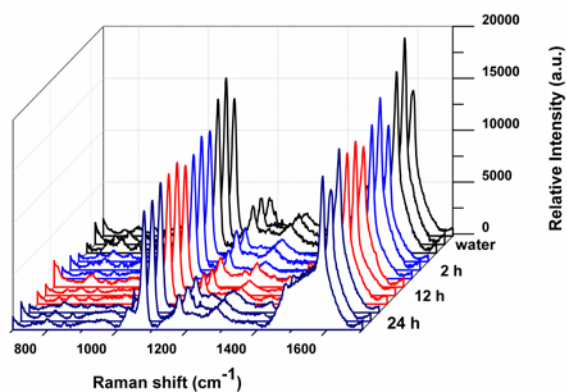

**Figure S2.** Raman spectra of CEGNAs collected from water and cell culture buffer (mixing for 2h, 12h and 24h respectively).

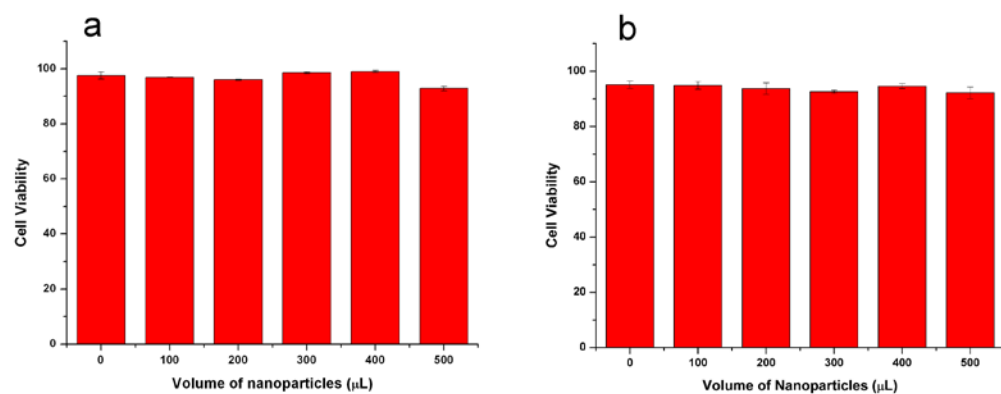

**Figure S3.** Cell viability after incubated with different volume of CGNAs for 24 h (a) and 48 h (b).

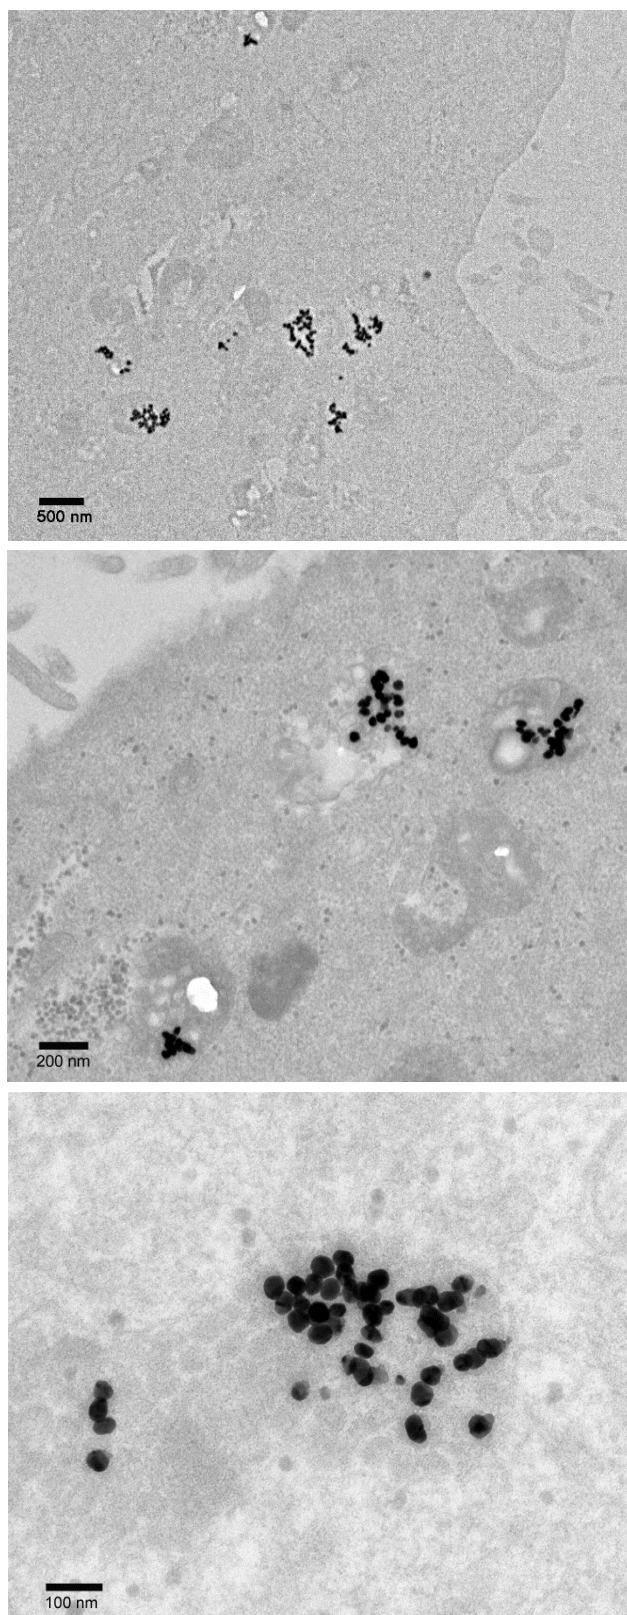

**Figure S4.** TEM images at different magnifications of cellular uptake of CEGNAs after incubated for 24h.
